# Supplementary material for: Antibiotic and heavy metal resistant endophytes inhabit Armeria maritima hyperaccumulator
Source: Research Square preprint supplement (doi:10.21203/rs.3.rs-2845134/v1), 2023-04-28
Supplement: Supplementary file 1 [file 422a7b3d205155042ce99418.doc]

**Supplementary Material**

**Antibiotic and heavy metal resistant endophytes inhabit *Armeria maritima* hyperaccumulator**

*Agata Goryluk-Salmonowicz1*, Anna W. Myczka2, Magdalena Popowska1*

1Department of Bacterial Physiology, Institute of Microbiology, Faculty of Biology, University of Warsaw, Miecznikowa 1, 02-096, Warsaw, Poland

2Witold Stefański Institute of Parasitology, Polish Academy of Sciences, Twarda 51/55, 00-818, Warsaw, Poland

*Correspondence: AGS: a.goryluk-salmonowicz@uw.edu.pl

Table S1. Identification of endophytic strains isolated from *Armeria maritima* subsp. halleri by MALDI-TOF analysis

| Strain | MALDI-TOF result | Identification score* | Final result |
| --- | --- | --- | --- |
| AM4 | *Pseudomonas fluorescens* | 2.08 | *Pseudomonas* sp. |
| AM8 | *Pseudomonas marginalis* | 2.22 | *Pseudomonas* sp. |
| AM14 | *Pseudomonas koreensis* | 1.96 | *Pseudomonas* sp. |
| Z13 | *Pseudomonas gessardii* | 1.98 | *Pseudomonas* sp. |
| Z18 | *Pseudomonas fragi* | 1.76 | *Pseudomonas* sp. |

*Identification scores:

2.3 – 3.0 – certain identification to species

2.0 – 2.99 – certain identification to genus

1.7 – 1.99 – probable identification to genus

< 1.69 – identification unpossible

Table S2. Antibiotic resistance profile of endophytic strains isolated from *Armeria maritima* subsp. halleri

| Antibiotic | Tested *Pseudomonas* sp. strains | | | | | Zone diameter breakpoints (mm)* | |
| --- | --- | --- | --- | --- | --- | --- | --- |
| AM4 | AM8 | AM14 | Z13 | Z18 | S > | R < |
| Amoxicillin/clavulanic acid | 0 | 0 | 0 | 0 | 0 | - | - |
| Amikacin | 27 | 32 | 28 | 32 | 30 | 15 | 15 |
| Aztreonam | 0 | 0 | 0 | 0 | 0 | 50 | 18 |
| Cefepime | 12 | 16 | 11 | 26 | 13 | 50 | 21 |
| Ceftazidime | 0 | 12 | 0 | 25 | 12 | 50 | 17 |
| Ciprofloxacin | 33 | 30 | 30 | 35 | 35 | 50 | 26 |
| Erythromycin | 0 | 0 | 0 | 12 | 0 | - | - |
| Fosfomycin | 20 | 35 | 21 | 40 | 40 | - | - |
| Imipenem | 18 | 26 | 16 | 32 | 32 | 50 | 20 |
| Levofloxacin | 28 | 30 | 21 | 35 | 30 | 50 | 18 |
| Meropenem | 11 | 11 | 0 | 12 | 0 | 24 | 18 |
| Piperacilin | 25 | 25 | 23 | 30 | 28 | 18 | 18-19 |
| Piperacilin-tazobactam | 30 | 24 | 22 | 30 | 30 | 18 | 18-19 |
| Streptomycin | 0 | 0 | 10 | 0 | 0 | - | - |
| Tobramycin | 29 | 30 | 26 | 30 | 30 | 18 | 18 |
| Vancomycin | 0 | 0 | 0 | 0 | 0 | - | - |

*Zone diameter breakpoints according to the European Committee on Antimicrobial Susceptibility Testing EUCAST version 11.0, valid from 2023-01-01.

Table S3. Identification of endophytic strains isolated from *Armeria maritima* subsp. halleri by genome-based taxonomic analysis in TYGS server

| Type Strain Genome Server | | | | | | | | |
| --- | --- | --- | --- | --- | --- | --- | --- | --- |
| **Strain** | **Subject strain** | **dDDH (d0, in %)** | **C.I. (d0, in %)** | **dDDH (d4, in %)** | **C.I. (d4, in %)** | **dDDH (d6, in %)** | **C.I. (d6, in %)** | **G+C content difference (in %)** |
| 'AM4a' | Pseudomonas paracarnis V5/DAB/2/5 | 78.6 | [74.6 - 82.1] | 63 | [60.1 - 65.8] | 78.2 | [74.8 - 81.3] | 0.11 |
| 'AM4a' | Pseudomonas lactis DSM 29167 | 76 | [72.0 - 79.6] | 60.1 | [57.3 - 62.9] | 75.3 | [71.8 - 78.5] | 0.01 |
| 'AM4a' | Pseudomonas carnis B4-1T | 75.8 | [71.8 - 79.4] | 59.7 | [56.9 - 62.5] | 75 | [71.6 - 78.2] | 0.22 |
| 'AM4a' | Pseudomonas salmasensis SWRI126 | 77 | [73.0 - 80.6] | 57.5 | [54.8 - 60.3] | 75.5 | [72.0 - 78.7] | 0.13 |
| 'AM4a' | Pseudomonas paralactis DSM 29164 | 74 | [70.0 - 77.6] | 40.9 | [38.4 - 43.4] | 67.1 | [63.7 - 70.3] | 0.31 |
| 'AM4a' | Pseudomonas libanensis DSM 17149 | 67.6 | [63.8 - 71.3] | 39.7 | [37.2 - 42.3] | 61.6 | [58.4 - 64.8] | 0.15 |
| 'AM4a' | Pseudomonas haemolytica DSM 108987T | 68.5 | [64.6 - 72.2] | 39.3 | [36.8 - 41.8] | 62.1 | [58.8 - 65.3] | 0 |
| 'AM4a' | Pseudomonas synxantha DSM 18928 | 62.4 | [58.7 - 66.0] | 38.8 | [36.3 - 41.3] | 57.2 | [54.0 - 60.3] | 0.37 |
| 'AM4a' | Pseudomonas khavaziana SWRI124 | 65.3 | [61.5 - 68.9] | 38.2 | [35.7 - 40.7] | 59.2 | [55.9 - 62.3] | 0.4 |
| 'AM4a' | Pseudomonas orientalis DSM 17489 | 59.6 | [56.0 - 63.2] | 34.2 | [31.8 - 36.7] | 53.1 | [50.0 - 56.2] | 0.48 |
| 'AM4a' | Pseudomonas azotoformans LMG 21611 | 53.1 | [49.6 - 56.6] | 32.9 | [30.5 - 35.4] | 47.7 | [44.7 - 50.7] | 0.95 |
| 'AM4a' | Pseudomonas pergaminensis 1008T | 52.6 | [49.1 - 56.1] | 32.8 | [30.4 - 35.3] | 47.3 | [44.3 - 50.3] | 0.71 |
| 'AM4a' | Pusillimonas minor YC-7-48T | 12.6 | [9.9 - 15.8] | 28.3 | [26.0 - 30.8] | 13 | [10.6 - 15.7] | 2.66 |
| 'AM4a' | Pseudomonas mucidolens LMG 2223 | 36.8 | [33.5 - 40.3] | 27.9 | [25.5 - 30.4] | 33.7 | [30.8 - 36.8] | 0.94 |
| 'AM8a' | Pseudomonas marginalis DSM 13124 | 80.2 | [76.3 - 83.6] | 88.8 | [86.4 - 90.8] | 84.6 | [81.3 - 87.3] | 0.19 |
| 'AM8a' | Pseudomonas grimontii DSM 17515 | 64.9 | [61.1 - 68.5] | 54.5 | [51.8 - 57.2] | 64.3 | [61.0 - 67.5] | 0.37 |
| 'AM8a' | Pseudomonas sivasensis P7 | 56.6 | [53.1 - 60.2] | 37.8 | [35.4 - 40.3] | 52.3 | [49.2 - 55.4] | 0.95 |
| 'AM8a' | Pseudomonas cyclaminis MAFF 301449T | 57.4 | [53.8 - 60.9] | 37.7 | [35.2 - 40.2] | 52.9 | [49.8 - 55.9] | 0.18 |
| 'AM8a' | Pseudomonas marginalis ICMP 3553 | 59.3 | [55.6 - 62.8] | 37.1 | [34.6 - 39.6] | 54.1 | [50.9 - 57.2] | 0.03 |
| 'AM8a' | Pseudomonas aylmerensis S1E40 | 53.5 | [50.0 - 56.9] | 37.1 | [34.6 - 39.6] | 49.5 | [46.5 - 52.6] | 1.2 |
| 'AM8a' | Pseudomonas petroselini MAFF 311094 | 57.1 | [53.5 - 60.6] | 36.9 | [34.4 - 39.4] | 52.3 | [49.2 - 55.4] | 0.37 |
| 'AM8a' | Pseudomonas extremaustralis 14-3 | 45.8 | [42.5 - 49.3] | 36.2 | [33.8 - 38.7] | 43.2 | [40.2 - 46.2] | 0.22 |
| 'AM8a' | Pseudomonas asgharzadehiana SWRI132 | 55.1 | [51.6 - 58.6] | 36.2 | [33.8 - 38.7] | 50.5 | [47.4 - 53.6] | 0.15 |
| 'AM8a' | Pseudomonas extremorientalis LMG 19695 | 54.1 | [50.6 - 57.6] | 36 | [33.6 - 38.6] | 49.7 | [46.6 - 52.7] | 0.49 |
| 'AM8a' | Pseudomonas fildesensis KG01 | 55.3 | [51.8 - 58.8] | 35.9 | [33.5 - 38.4] | 50.6 | [47.5 - 53.6] | 0.3 |
| 'AM8a' | Pseudomonas azotoformans LMG 21611 | 54.6 | [51.1 - 58.1] | 35.9 | [33.4 - 38.4] | 50 | [46.9 - 53.1] | 0.54 |
| 'AM8a' | Pseudomonas nabeulensis E10BT | 46.1 | [42.7 - 49.5] | 34.6 | [32.1 - 37.1] | 42.9 | [39.9 - 45.9] | 0.15 |
| 'AM8a' | Pseudomonas rhodesiae LMG 17764 | 51.5 | [48.0 - 54.9] | 32.8 | [30.4 - 35.4] | 46.4 | [43.4 - 49.5] | 0.27 |
| 'AM8a' | Pseudomonas kitaguniensis MAFF 212408T | 42.4 | [39.0 - 45.8] | 32.6 | [30.2 - 35.1] | 39.4 | [36.4 - 42.4] | 0.96 |
| 'AM14a' | Pseudomonas koreensis LMG 21318 | 78.7 | [74.8 - 82.2] | 43.9 | [41.3 - 46.4] | 72.2 | [68.7 - 75.4] | 0.27 |
| 'AM14a' | Pseudomonas koreensis JCM 14769 | 78.6 | [74.6 - 82.1] | 43.8 | [41.3 - 46.4] | 72 | [68.5 - 75.2] | 0.32 |
| 'AM14a' | Pseudomonas monsensis PGSB 8459 | 67.5 | [63.6 - 71.1] | 37.1 | [34.7 - 39.6] | 60.3 | [57.1 - 63.5] | 0.21 |
| 'AM14a' | Pseudomonas baetica LMG 25716 | 60.5 | [56.8 - 64.0] | 35 | [32.6 - 37.5] | 54.1 | [51.0 - 57.2] | 1.51 |
| 'AM14a' | Pseudomonas tensinigenes ZA 5.3 | 68.2 | [64.3 - 71.9] | 34.8 | [32.4 - 37.3] | 59.7 | [56.5 - 62.9] | 1.09 |
| 'AM14a' | Pseudomonas zeae OE 48.2 | 67.5 | [63.6 - 71.1] | 34.8 | [32.3 - 37.3] | 59.2 | [55.9 - 62.3] | 1.27 |
| 'AM14a' | Pseudomonas neuropathica P155 T | 68.8 | [64.9 - 72.5] | 34.8 | [32.4 - 37.3] | 60.2 | [56.9 - 63.3] | 1.03 |
| 'AM14a' | Pseudomonas germanica FIT28 | 66.2 | [62.4 - 69.9] | 34.6 | [32.1 - 37.1] | 58.1 | [54.9 - 61.3] | 1.17 |
| 'AM14a' | Pseudomonas crudilactis UCMA 17988T | 67.9 | [64.0 - 71.6] | 34.6 | [32.1 - 37.1] | 59.4 | [56.1 - 62.5] | 1.13 |
| 'AM14a' | Pseudomonas allokribbensis LMG31525T | 62.6 | [58.8 - 66.2] | 34.6 | [32.2 - 37.1] | 55.5 | [52.3 - 58.6] | 0.08 |
| 'AM14a' | Pseudomonas fitomaticsae FIT81 | 63.1 | [59.3 - 66.7] | 34.5 | [32.1 - 37.0] | 55.8 | [52.6 - 58.9] | 0.33 |
| 'AM14a' | Pseudomonas kribbensis KCTC 32541T | 64.7 | [60.9 - 68.3] | 34.5 | [32.1 - 37.0] | 57 | [53.8 - 60.1] | 0.28 |
| 'AM14a' | Pseudomonas glycinae MS586 | 65.5 | [61.7 - 69.2] | 34.2 | [31.8 - 36.7] | 57.4 | [54.2 - 60.6] | 0.22 |
| 'AM14a' | Pseudomonas gozinkensis LMG 31526 | 65.7 | [61.9 - 69.4] | 33.7 | [31.3 - 36.2] | 57.3 | [54.1 - 60.5] | 0.04 |
| 'AM14a' | Pseudomonas iranensis SWRI54 | 58.9 | [55.3 - 62.5] | 33 | [30.5 - 35.5] | 52 | [48.9 - 55.1] | 0.37 |
| 'AM14a' | Pseudomonas atacamensis M7D1 | 58.5 | [54.9 - 62.1] | 32.8 | [30.4 - 35.4] | 51.7 | [48.6 - 54.7] | 0.39 |
| 'AM14a' | Pseudomonas moraviensis LMG 24280 | 61 | [57.3 - 64.5] | 32.7 | [30.3 - 35.2] | 53.4 | [50.3 - 56.5] | 0.1 |
| 'AM14a' | Pseudomonas reinekei MT1 | 41.7 | [38.4 - 45.2] | 28.6 | [26.2 - 31.1] | 37.6 | [34.7 - 40.7] | 1.09 |
| 'Z18a' | Pseudomonas yamanorum LMG 27247 | 70.7 | [66.7 - 74.3] | 48.3 | [45.7 - 50.9] | 67.3 | [63.9 - 70.6] | 0.64 |
| 'Z18a' | Pseudomonas spelaei CCM 7893 | 48.3 | [44.9 - 51.7] | 32.6 | [30.2 - 35.1] | 43.9 | [41.0 - 47.0] | 1.61 |
| 'Z18a' | Pseudomonas aylmerensis S1E40 | 53.6 | [50.1 - 57.1] | 31.2 | [28.8 - 33.8] | 47.3 | [44.3 - 50.4] | 0.67 |
| 'Z18a' | Pseudomonas karstica CCM 7891 | 40.5 | [37.2 - 44.0] | 31.2 | [28.8 - 33.7] | 37.5 | [34.6 - 40.6] | 2.09 |
| 'Z18a' | Pseudomonas petroselini MAFF 311094 | 44.8 | [41.4 - 48.2] | 31.2 | [28.8 - 33.7] | 40.8 | [37.8 - 43.8] | 0.9 |
| 'Z18a' | Pseudomonas edaphica RD25 | 44.3 | [40.9 - 47.7] | 31.2 | [28.8 - 33.7] | 40.4 | [37.4 - 43.4] | 1.04 |
| 'Z18a' | Pseudomonas marginalis ICMP 3553 | 46.1 | [42.7 - 49.5] | 31.1 | [28.7 - 33.6] | 41.7 | [38.7 - 44.7] | 0.56 |
| 'Z18a' | Pseudomonas allii MAFF 301514 | 47.2 | [43.8 - 50.6] | 31 | [28.6 - 33.5] | 42.5 | [39.6 - 45.6] | 0.11 |
| 'Z18a' | Pseudomonas brenneri DSM 15294 | 42.7 | [39.3 - 46.2] | 30.9 | [28.5 - 33.4] | 39.1 | [36.2 - 42.2] | 0.83 |
| 'Z18a' | Pseudomonas extremorientalis LMG 19695 | 49 | [45.5 - 52.4] | 30.9 | [28.5 - 33.4] | 43.8 | [40.8 - 46.8] | 0.05 |
| 'Z18a' | Pseudomonas brenneri JCM 13307 | 42.7 | [39.3 - 46.1] | 30.8 | [28.4 - 33.3] | 39.1 | [36.1 - 42.1] | 0.77 |
| 'Z18a' | Pseudomonas pergaminensis 1008T | 52.3 | [48.8 - 55.8] | 30.7 | [28.3 - 33.2] | 46.1 | [43.1 - 49.2] | 0.23 |
| 'Z18a' | Pseudomonas azotoformans LMG 21611 | 49.2 | [45.8 - 52.7] | 30.7 | [28.3 - 33.2] | 43.9 | [40.9 - 47.0] | 0.01 |
| 'Z18a' | Pseudomonas lurida LMG 21995 | 49.2 | [45.8 - 52.6] | 30.6 | [28.2 - 33.1] | 43.8 | [40.9 - 46.9] | 0.37 |
| 'Z18a' | Pseudomonas libanensis DSM 17149 | 43.3 | [39.9 - 46.7] | 30.4 | [28.0 - 32.9] | 39.4 | [36.4 - 42.4] | 0.79 |
| 'Z18a' | Pseudomonas lini DSM 16768 | 28.6 | [25.2 - 32.2] | 25.9 | [23.5 - 28.3] | 26.9 | [24.0 - 30.0] | 2.16 |
| 'Z18a' | Pseudomonas migulae NBRC 103157 | 28.4 | [25.0 - 32.0] | 25.7 | [23.4 - 28.2] | 26.7 | [23.8 - 29.8] | 1.85 |
| 'Z18a' | Pseudomonas gregormendelii LMG 28632 | 27.1 | [23.7 - 30.7] | 25.6 | [23.3 - 28.1] | 25.6 | [22.7 - 28.7] | 1.36 |
